# Supplementary material for: Two azo-functionalized luminescent 3D Cd(ii) MOFs for highly selective detection of Fe3+ and Al3+
Source: Royal Society of Chemistry journal article supplement (doi:10.1039/c8nj02338g), 2018-01-01
Supplement: c8nj02338g1.pdf [file c8nj02338g1.pdf]

## New Journal of Chemistry

### Electronic Supplementary Information (ESI)

#### Two Azo-functionalized Luminescent 3D Cd(II)-MOFs for Highly Selective Detection of Fe<sup>3+</sup> and Al<sup>3+</sup>

Santanu Chand,<sup>a</sup> Manas Mandal,<sup>a</sup> Shyam Chand Pal,<sup>a</sup> Arun Pal,<sup>a</sup> Sinchan Maji,<sup>b</sup> Debaprasad Mandal<sup>b</sup> and Madhab C. Das<sup>a\*</sup>

<sup>a</sup>Department of Chemistry, Indian Institute of Technology Kharagpur, WB, 721302, India

<sup>b</sup>Department of Chemistry, Indian Institute of Technology Ropar, Punjab, 140001, India

E-mail: [mcdas@chem.iitkgp.ac.in](mailto:mcdas@chem.iitkgp.ac.in)

**Physical Measurements.** The FT-IR spectra were recorded from KBr pellets in the range of 400-4000 cm<sup>-1</sup> on a Perkin-Elmer RX1 spectrophotometer. PXRD patterns were recorded using Cu K<sub>α</sub> radiation (1.5418 Å) on a Bruker D8 Advance diffractometer. Thermogravimetric analysis (TGA) was performed using a TG 209 F3 Tarsus (Netzsch) and the sample was heated from room temperature to 800 °C at a rate of 5 °C min<sup>-1</sup> under N<sub>2</sub> atmosphere. <sup>1</sup>H, <sup>13</sup>C-NMR spectrum was recorded using a Bruker Avance II 400 spectrometer. Mass (MALDI-TOF) spectrum was recorded using a Bruker MALDI-TOF/TOF mass spectrometer. The luminescence spectra for the powdered solid samples were measured at room temperature using a Horiba Fluorolog spectrophotometer and the solution state fluorescence spectra were recorded using a Shimadzu-RF-6000 spectrophotometer. The UV-Vis spectra for the salt and small organic solvents solutions were measured at room temperature using a Shimadzu UV-2600 UV-Vis spectrophotometer. The morphology and elemental analysis of the samples were examined on a CarlZeiss MERLIN field emission scanning electron microscopy (FESEM) equipped with energy dispersive X-ray spectroscopy (EDX).

**Single Crystal X-ray Diffraction.** The crystal and refinement data for **1** and **2** were collected in Table S1. In this case, a crystal of appropriate size was selected from the mother liquor and immersed in paratone oil and then it was mounted on the tip of a glass fibre and cemented using epoxy resin. Single crystal X-ray data were collected at 300 K on a Bruker SMART APEX II CCD diffractometer using graphite-monochromated Mo-K<sub>α</sub> radiation (0.71073 Å).

The linear absorption coefficients, scattering factors for the atoms and the anomalous dispersion corrections were taken from International Tables for X-ray Crystallography. The data integration and reduction were processed with SAINT<sup>1</sup> software. An empirical absorption correction was applied to the collected reflections with SADABS using XPREP.<sup>2</sup> The structure was solved by the direct method using SHELXTL<sup>3</sup> and was refined on F<sup>2</sup> by full-matrix least-squares technique using the SHELXL-2014<sup>4</sup> program package. For all the cases non-hydrogen atoms were refined anisotropically. Attempts to identify the highly disordered solvent molecules for **Cd-MOF-1** was failed. Instead, a new set of F<sup>2</sup> (hkl) values with the contribution from the solvent molecules withdrawn was obtained by the SQUEEZE procedure implemented in PLATON.<sup>5</sup> Selected bond lengths and bond angles are listed in Table S3 and S5.

**Synthesis of 3,3'-azobis(pyridine) (L).** The ligand L [3,3'-azobis(pyridine)] was synthesized based on a published methods.<sup>[12a, 12c in main text]</sup> A solution of 3-aminopyridine (12 g, 98%, 0.128 mol) in DI water (240 mL) was added drop wise into a two-neck round bottom flask containing 1.6 L of sodium hypochlorite (10-14wt %, NaOCl, being chilled in ice-water bath and magnetically stirred) over a period of 1 hr. The mixture was stirred at 0°C for another 30 min before the orange-coloured precipitate was filtered and the filtrate extracted with chloroform (200 mL × 3). The combined organic layers were dried over magnesium sulphate, then filtrated and remove the solvent, the corresponding crude product was purified by column chromatography on silica gel (ethyl acetate) to afford. The pure product was obtained as an orange-coloured, crystalline solid (needle shaped crystals, 7.32 g, 64% yield based on 4-aminopyridine). <sup>1</sup>H NMR (400MHz, CDCl<sub>3</sub>): δ 9.23 (s, 2H), 8.74 (d, 2H), 8.17(d, 2H), 7.47(dd, 2H). <sup>13</sup>C NMR (400MHz, CDCl<sub>3</sub>): δ 152.1, 147.5, 140.9, 126.6, 123.8. FT-IR (KBr pellet, cm<sup>-1</sup>): 3855(w), 3437.9(b), 2923(m), 2372.1(w), 1587(s), 1469(m), 1421(s), 1317(m), 1232(m), 1191.6(s), 1088(s), 1017.7(s), 958.4(m), 821.5(s), 699(s), 625(s), 547.7(m), 521.8(s).

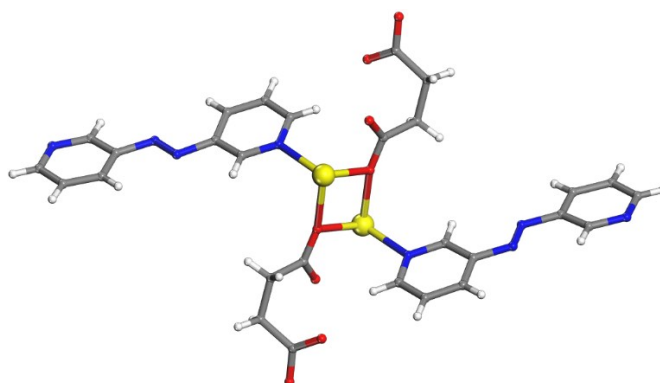

**Fig. S1** Asymmetric unit of **Cd-MOF-1**. Color code: Cd, yellow; N, blue; O, red; C, grey; H, white.

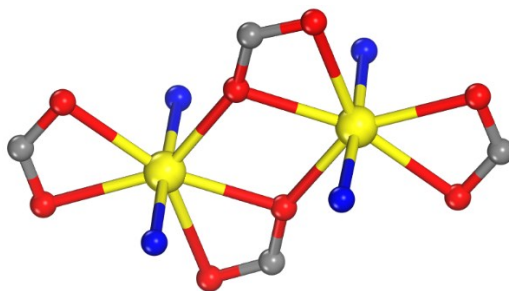

**Fig. S2** Core View of **Cd-MOF-1**. Color code: Cd, yellow; N, blue; O, red; C, grey; H atoms are omitted for clarity.

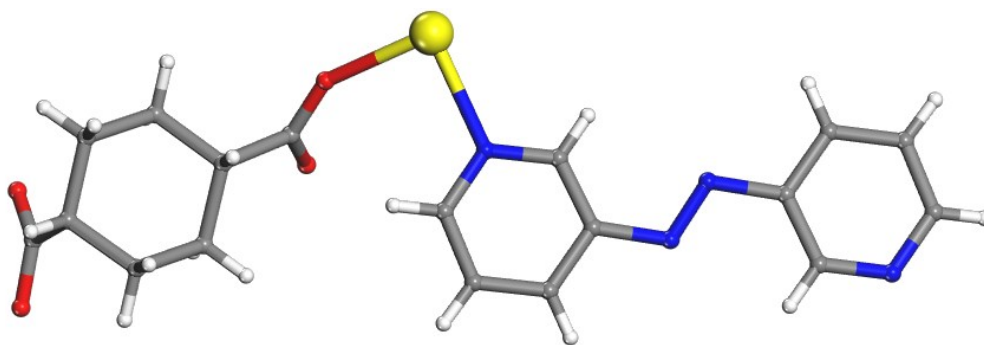

**Fig. S3** Asymmetric unit of **Cd-MOF-2**. Color code: Cd, yellow; N, blue; O, red; C, grey; H, white.

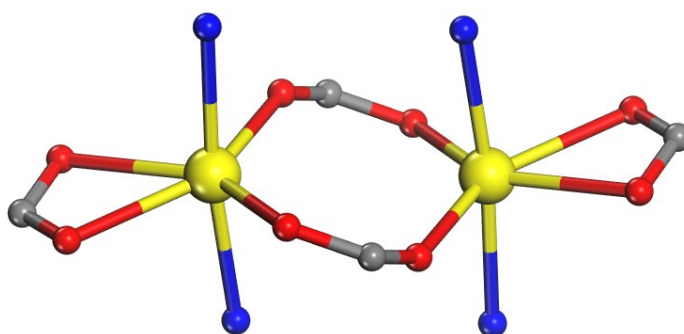

**Fig. S4** Core View of **Cd-MOF-1**. Color code: Cd, yellow; N, blue; O, red; C, grey; H atoms are omitted for clarity.

**Table S1:** Crystal data and structure refinements for **Cd-MOF-1** and **Cd-MOF-2**.

|                                                    | <b>Cd-MOF-1</b>                                                               | <b>Cd-MOF-2</b>                                                  |
|----------------------------------------------------|-------------------------------------------------------------------------------|------------------------------------------------------------------|
| Empirical formula                                  | C <sub>28</sub> H <sub>24</sub> Cd <sub>2</sub> N <sub>8</sub> O <sub>8</sub> | C <sub>18</sub> H <sub>18</sub> Cd N <sub>4</sub> O <sub>4</sub> |
| Formula weight                                     | 825.35                                                                        | 466.76                                                           |
| Temperature(K)                                     | 293(2)                                                                        | 293(2)                                                           |
| Radiation                                          | Mo (k <sub>α</sub> )                                                          | Mo (k <sub>α</sub> )                                             |
| Wavelength(λ)                                      | 0.71073                                                                       | 0.71073                                                          |
| Crystal system                                     | Monoclinic                                                                    | Monoclinic                                                       |
| Space group                                        | <i>P</i> 2 <sub>1</sub> / <i>n</i>                                            | <i>P</i> 2 <sub>1</sub> / <i>n</i>                               |
| <i>a</i> [Å]                                       | 13.680(4)                                                                     | 11.265(2)                                                        |
| <i>b</i> [Å]                                       | 10.906(12)                                                                    | 13.097(3)                                                        |
| <i>c</i> [Å]                                       | 20.884(3)                                                                     | 12.563(3)                                                        |
| <i>α</i> [°]                                       | 90.00                                                                         | 90.00                                                            |
| <i>β</i> [°]                                       | 92.26(2)                                                                      | 106.74(3)                                                        |
| <i>γ</i> [°]                                       | 90.00                                                                         | 90.00                                                            |
| Volume[Å <sup>3</sup> ]                            | 3113(4)                                                                       | 1775.0(7)                                                        |
| <i>Z</i>                                           | 4                                                                             | 4                                                                |
| Density (calculated)<br>[Mg/m <sup>3</sup> ]       | 1.761                                                                         | 1.747                                                            |
| Absorption coefficient<br>[mm <sup>-1</sup> ]      | 1.428                                                                         | 1.263                                                            |
| F(000)                                             | 1632                                                                          | 963                                                              |
| Refl. used [ <i>I</i> > 2σ( <i>I</i> )]            | 5705                                                                          | 3563                                                             |
| Independent reflections                            | 6355                                                                          | 3649                                                             |
| Refinement method                                  | full-matrix least squares on <i>F</i> <sup>2</sup>                            | full-matrix least squares on<br><i>F</i> <sup>2</sup>            |
| GOF                                                | 1.054                                                                         | 1.120                                                            |
| Final <i>R</i> indices[ <i>I</i> > 2σ( <i>I</i> )] | <i>R</i> <sub>1</sub> =0.0535 <i>wR</i> <sub>2</sub> =0.1268                  | <i>R</i> <sub>1</sub> =0.0169 <i>wR</i> <sub>2</sub> =0.0429     |
| <i>R</i> indices (all data)                        | <i>R</i> <sub>1</sub> =0.0580 <i>wR</i> <sub>2</sub> =0.1294                  | <i>R</i> <sub>1</sub> =0.0175 <i>wR</i> <sub>2</sub> =0.0432     |

## Topology study

### 1. Cd-MOF-1

#####

1:C28 H20 Cd2 N8 O10

#####

Structure consists of molecules (ZD1). The composition of molecule is C2O2Cd2

Topology for ZD1

-----

Atom ZD1 links by bridge ligands and has

| Common vertex with        | R(A-A)   |        |   | f     | Total SA |
|---------------------------|----------|--------|---|-------|----------|
| ZD 1 0.0003 1.1953 0.2492 | ( 0 0 0) | 8.740A | 1 | 10.63 |          |
| ZD 1 0.0003 0.1953 0.2492 | ( 0-1 0) | 8.740A | 1 | 15.37 |          |
| ZD 1 1.0003 0.1953 0.2492 | ( 1-1 0) | 8.755A | 1 | 10.88 |          |
| ZD 1 1.0003 1.1953 0.2492 | ( 1 0 0) | 8.755A | 1 | 15.51 |          |

| Common edge with           | R(A-A)   |         |   | f     | Total SA |
|----------------------------|----------|---------|---|-------|----------|
| ZD 1 0.5003 0.3047 -0.2508 | ( 1 1 0) | 11.311A | 2 | 23.71 |          |
| ZD 1 0.5003 1.3047 0.7492  | ( 1 2 1) | 12.347A | 2 | 23.90 |          |

-----

Structural group analysis

-----

-----

Structural group No 1

-----

Structure consists of 3D framework with ZD

Coordination sequences

-----

|      |   |    |    |     |     |     |     |      |      |      |
|------|---|----|----|-----|-----|-----|-----|------|------|------|
| ZD1: | 1 | 2  | 3  | 4   | 5   | 6   | 7   | 8    | 9    | 10   |
| Num  | 6 | 22 | 52 | 94  | 148 | 214 | 292 | 382  | 484  | 598  |
| Cum  | 7 | 29 | 81 | 175 | 323 | 537 | 829 | 1211 | 1695 | 2293 |

-----  
TD10=2293

Vertex symbols for selected sublattice

-----  
ZD1 Point symbol:{4^8.6^6.8}

Extended point symbol:[4.4.4.4.4.4.4.6(6).6(6).6(9).6(9).6(9).8(66)]

-----  
Point symbol for net: {4^8.6^6.8}

6-c net; uninodal net

Topological type: rob (topos&RCSR.ttd) {4^8.6^6.8} - VS  
[4.4.4.4.4.4.4.6(4).6(4).6(8).6(8).6(8).6(8).\*] (16813 types in 3 databases)

Elapsed time: 2.72 sec.

## 2. Cd-MOF-2

#####

1:C18 H18 Cd N4 O4

#####

Structure consists of molecules (ZD1). The composition of molecule is C2Cd2

Topology for ZD1

-----  
Atom ZD1 links by bridge ligands and has

| Common vertex with |        |        |        | R(A-A)   | f      | Total SA |
|--------------------|--------|--------|--------|----------|--------|----------|
| ZD 1               | 1.0000 | 1.0000 | 1.0000 | ( 1 0 1) | 9.679A | 1 10.72  |
| ZD 1               | 0.0000 | 0.0000 | 0.0000 | ( 0-1 0) | 9.679A | 1 10.72  |
| ZD 1               | 0.0000 | 1.0000 | 0.0000 | ( 0 0 0) | 9.679A | 1 15.71  |
| ZD 1               | 1.0000 | 0.0000 | 1.0000 | ( 1-1 1) | 9.679A | 1 15.71  |

Common edge with

|      |         |        | R(A-A) | f        | Total SA |         |
|------|---------|--------|--------|----------|----------|---------|
| ZD 1 | 1.5000  | 0.5000 | 0.5000 | ( 1 0 0) | 11.265A  | 2 23.56 |
| ZD 1 | -0.5000 | 0.5000 | 0.5000 | (-1 0 0) | 11.265A  | 2 23.56 |

-----  
Structural group analysis

-----  
Structural group No 1  
-----

Structure consists of 3D framework with ZD

Coordination sequences  
-----

ZD1: 1 2 3 4 5 6 7 8 9 10

Num 6 18 38 66 102 146 198 258 326 402

Cum 7 25 63 129 231 377 575 833 1159 1561  
-----

TD10=1561

Vertex symbols for selected sublattice  
-----

ZD1 Point symbol: {4<sup>12</sup>.6<sup>3</sup>}

Extended point symbol: [4.4.4.4.4.4.4.4.4.4.4.4.6(4).6(4).6(4)]  
-----

Point symbol for net: {4<sup>12</sup>.6<sup>3</sup>}

6-c net; uninodal net

Topological type: pcu alpha-Po primitive cubic; 6/4/c1; sqc1 (topos&RCSR.ttd) {4<sup>12</sup>.6<sup>3</sup>} - VS  
[4.4.4.4.4.4.4.4.4.4.4.4.\*.\*.\*] (16813 types in 3 databases)

Elapsed time: 3.72 sec.

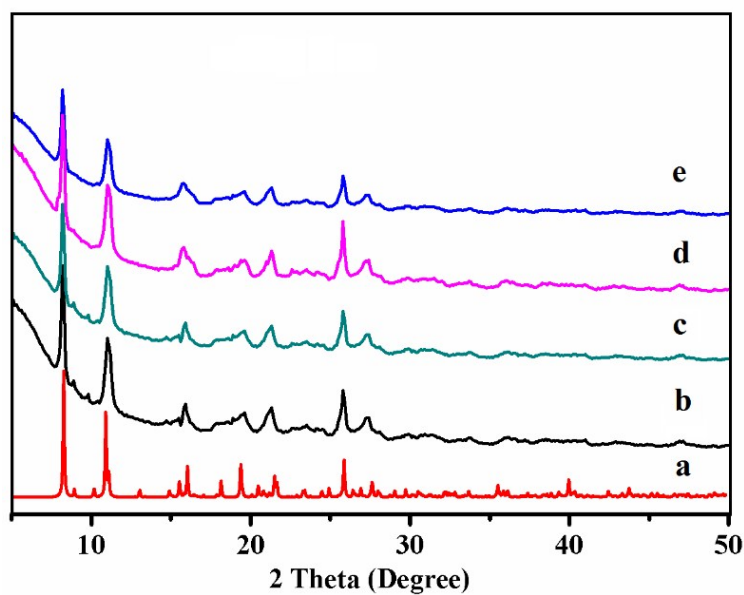

**Fig. S5** The PXRD pattern of simulated (a), as synthesized sample **Cd-MOF-1** (b), after treated the sample with DMF (4 mL) and water (1mL) for 12 hours (c), after the sensing experiment of Fe<sup>3+</sup> in DMF/water solution (d), after the sensing experiment of Al<sup>3+</sup> in DMF/water solution of **Cd-MOF-1** (e).

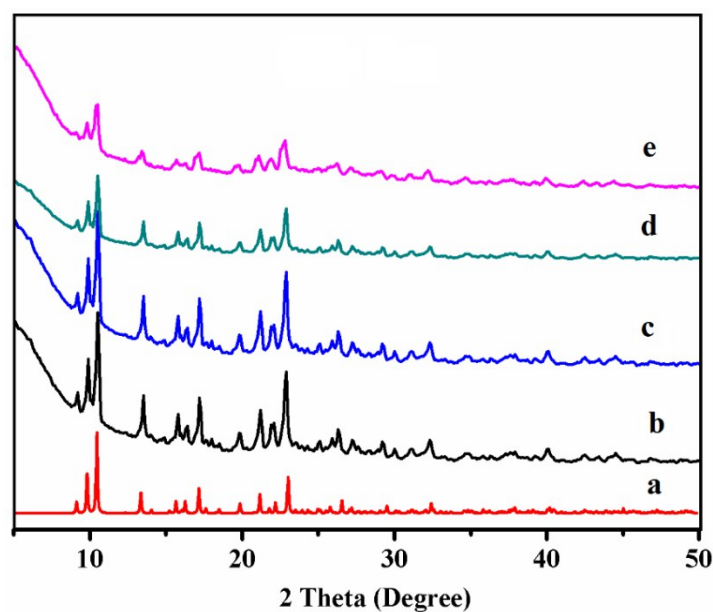

**Fig. S6** The PXRD pattern of simulated (a), as synthesized sample **Cd-MOF-2** (b), after treated the sample with DMF (4 mL) and water (1mL) for 12 hours (c), after the sensing experiment of Fe<sup>3+</sup> in DMF/water solution (d), after the sensing experiment of Al<sup>3+</sup> in DMF/water solution of **Cd-MOF-2** (e).



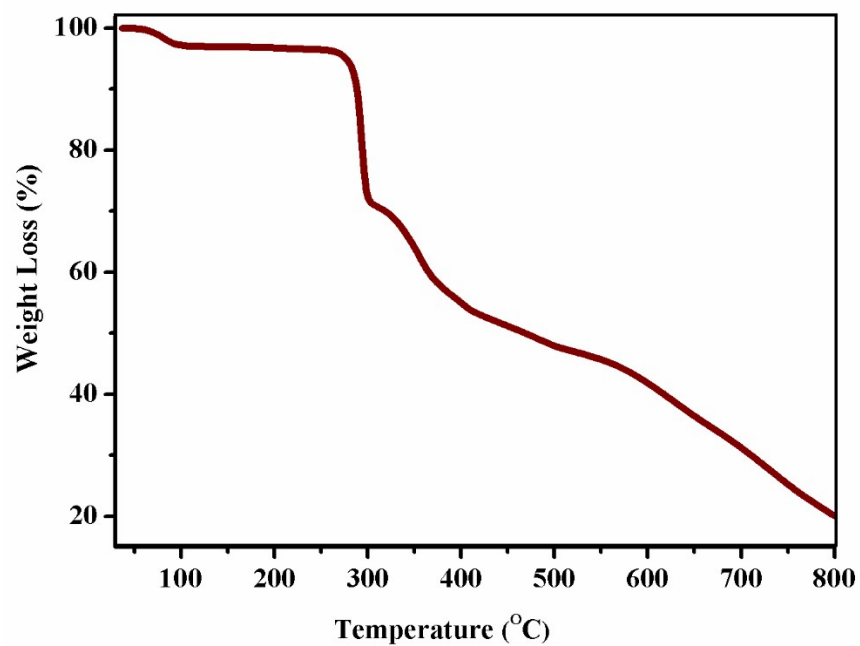

**Fig. S7** Thermo gravimetric analysis profile of Cd-MOF-1

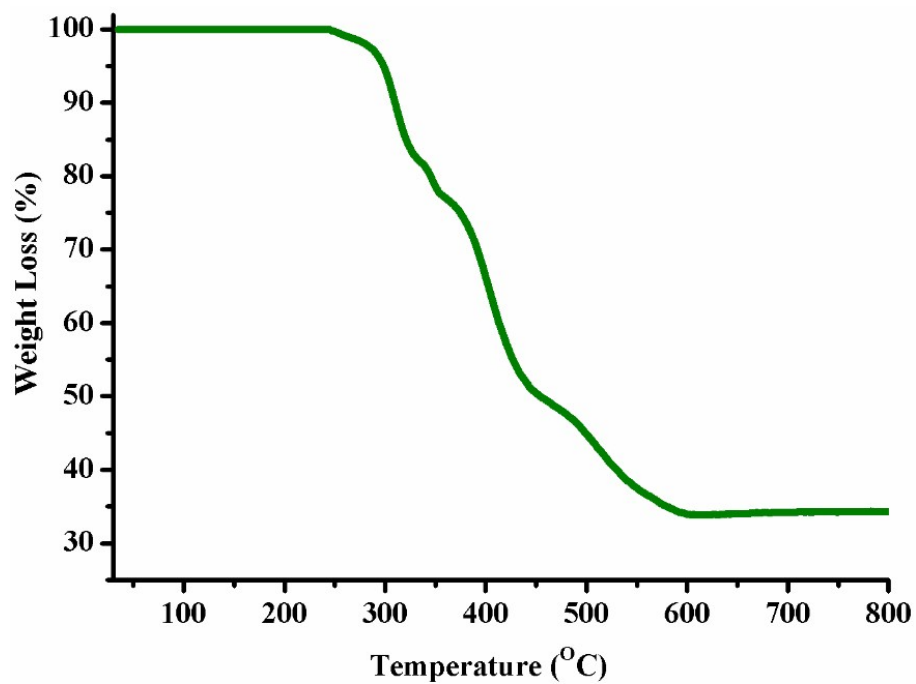

**Fig. S8** Thermo gravimetric analysis profile of Cd-MOF-2

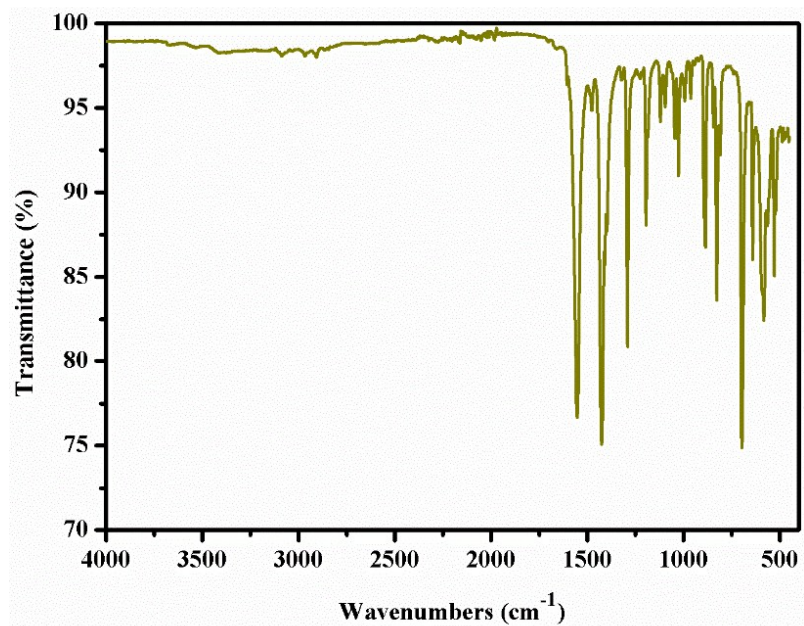

**Fig. S9** FT-IR spectra of Cd-MOF-1.

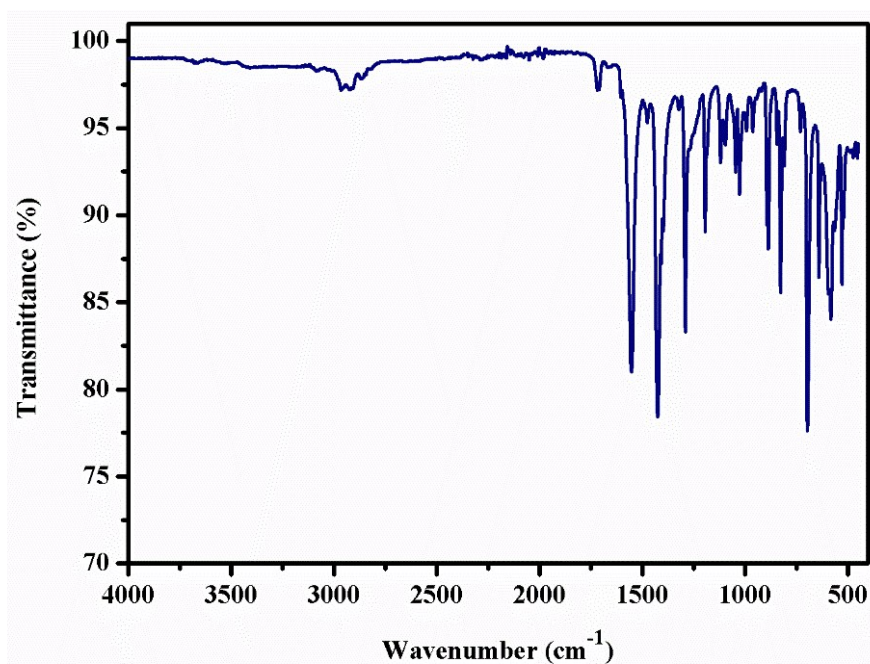

**Fig. S10** FT-IR spectra of Cd-MOF-2

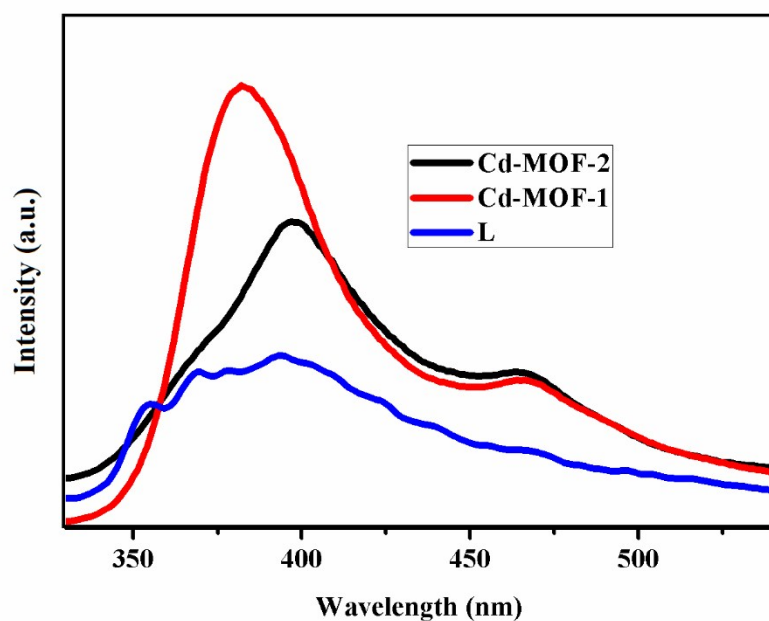

**Fig. S11** The solid state emission spectra of Cd-MOF-1 (red,  $\lambda_{\text{ex}} = 305$  nm), Cd-MOF-2 (black,  $\lambda_{\text{ex}} = 312$  nm) and the spacer L (blue,  $\lambda_{\text{ex}} = 300$  nm) at room temperature.

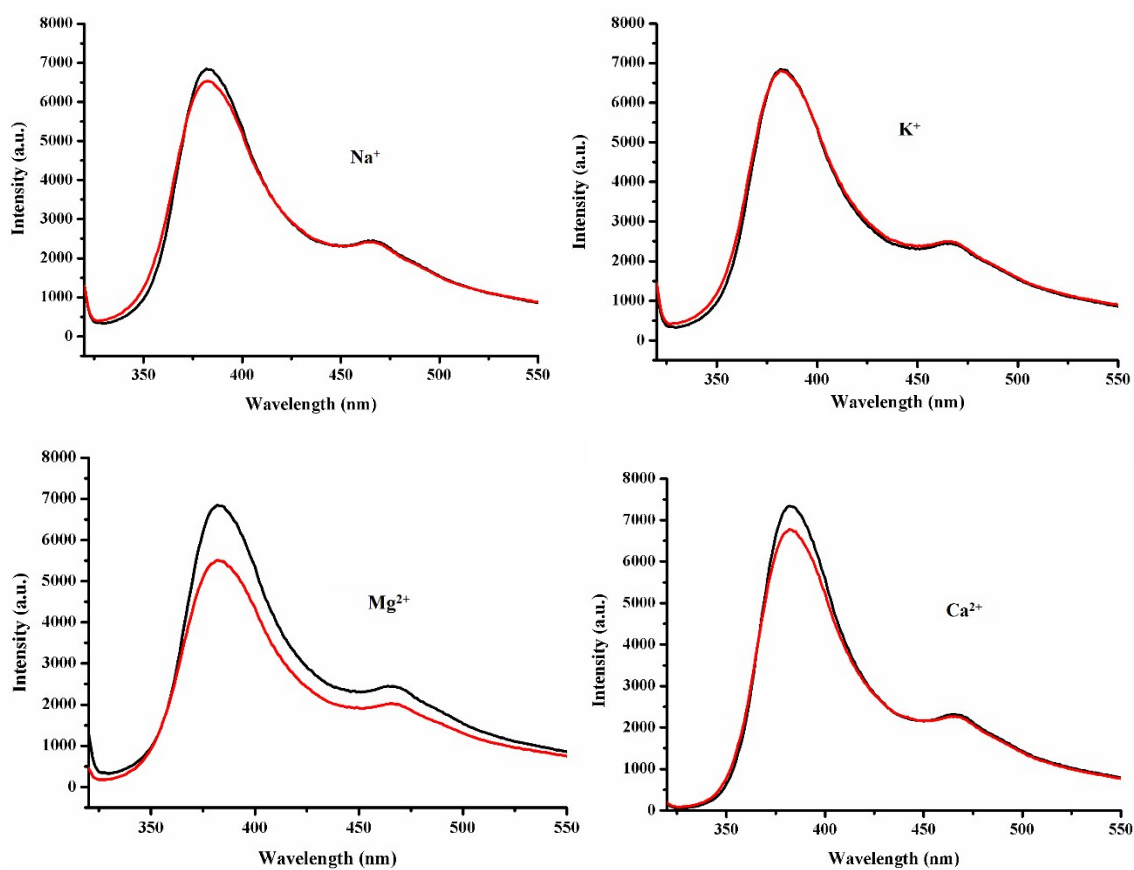

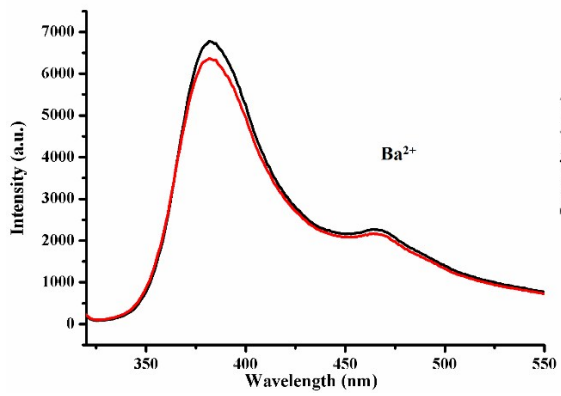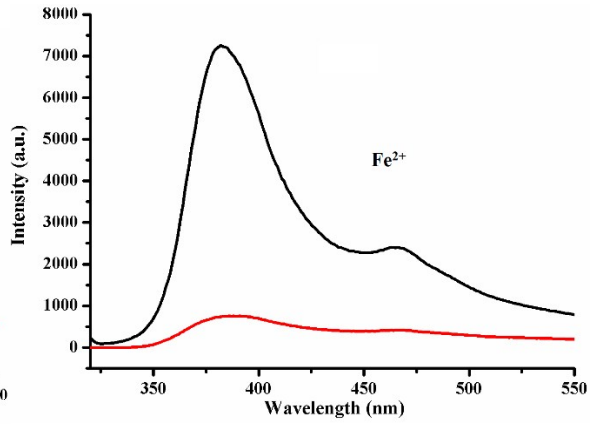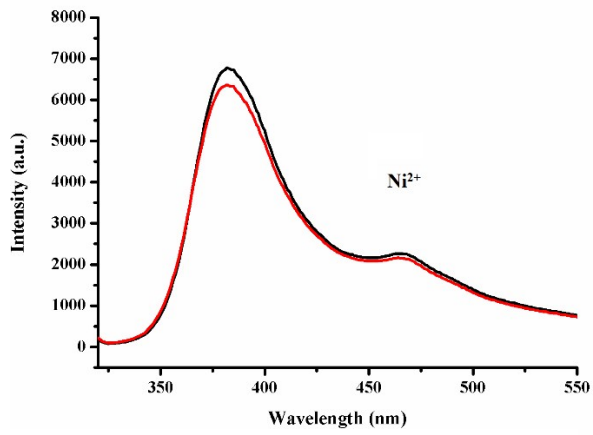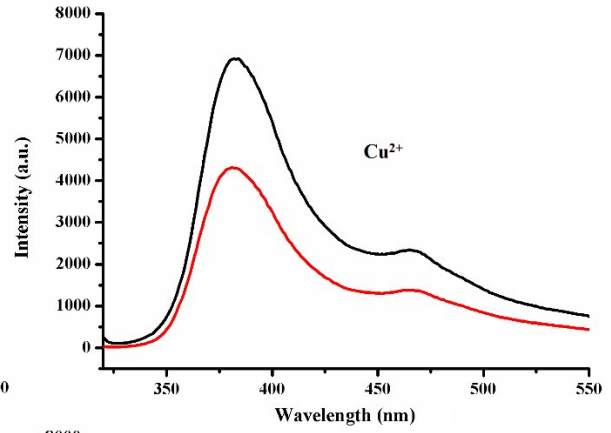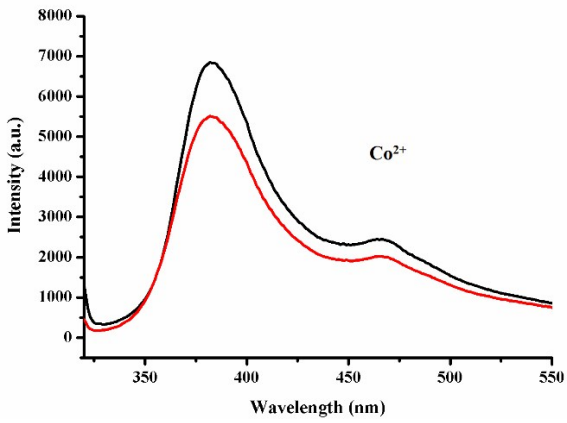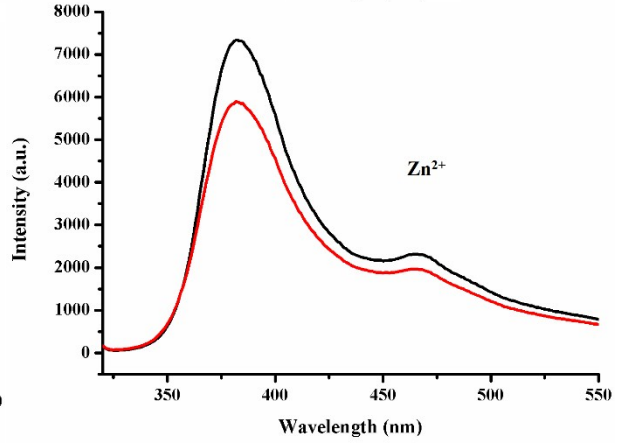

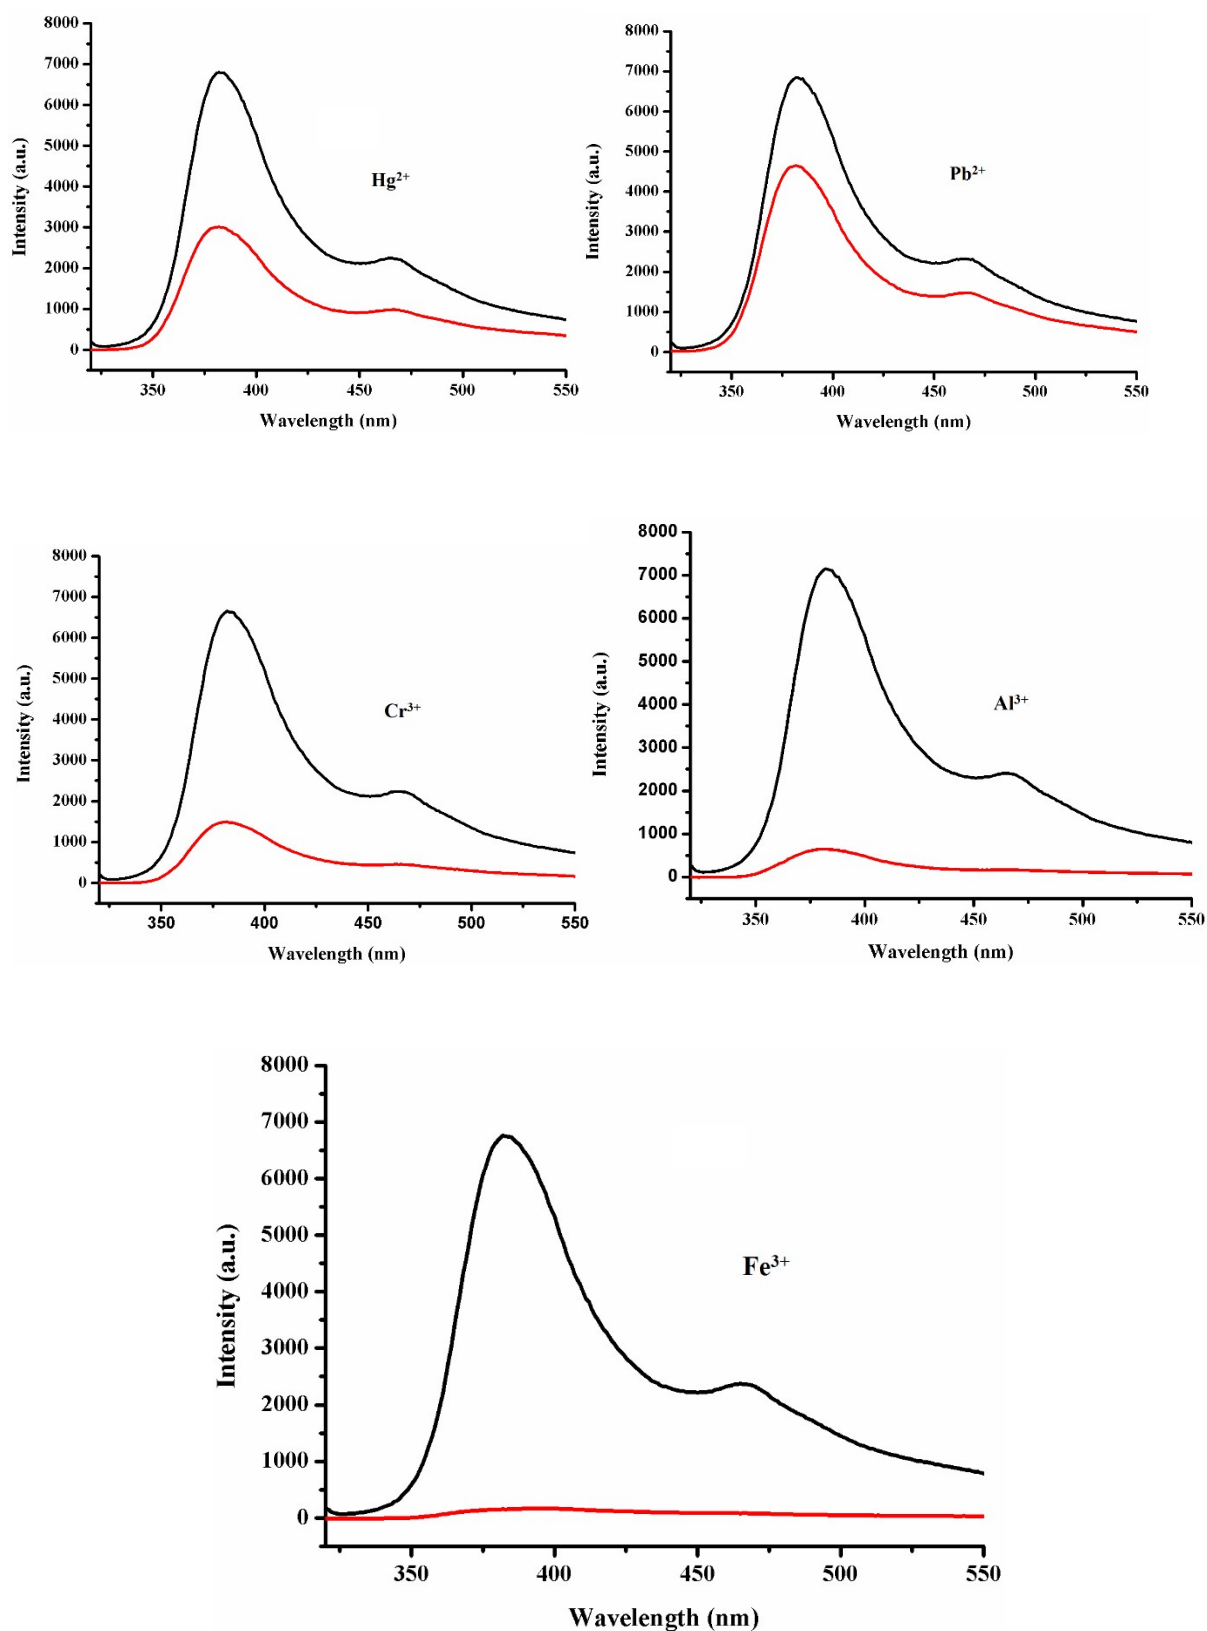

**Fig. S12** The fluorescence spectra of Cd-MOF-1 in DMF solution upon the addition of 100  $\mu\text{L}$  of  $10^{-2}$  mol/L of various metal ions.

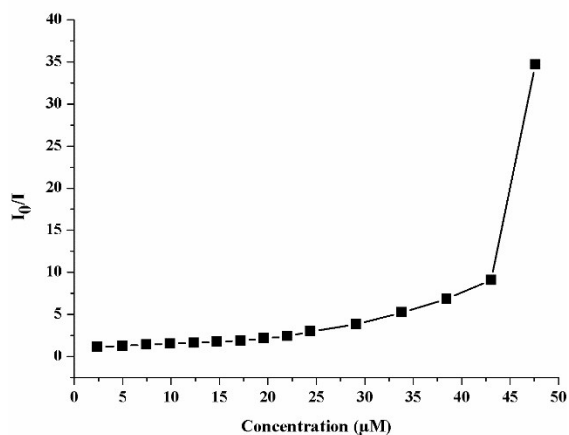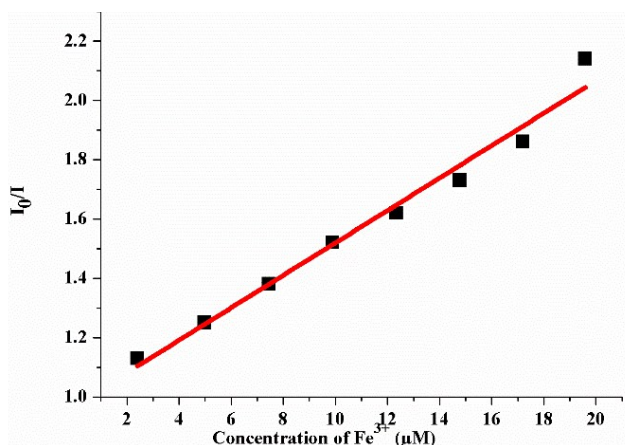

**Fig. S13** Stern-Volmer plot of Cd-MOF-1 by gradual addition of Fe<sup>3+</sup> ions (left). The plot (right) demonstrate the quenching linearity relationship at low concentrations of Fe<sup>3+</sup> ion.

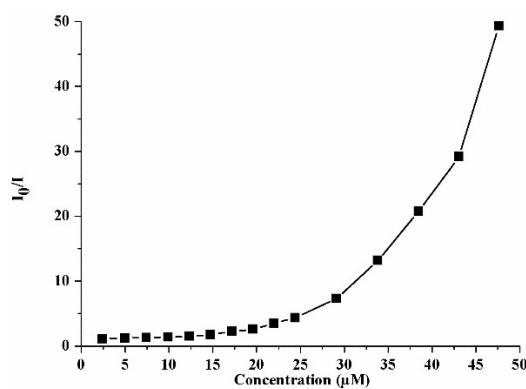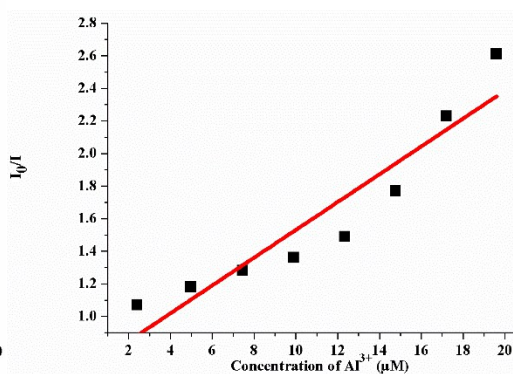

**Fig. S14** Stern-Volmer plot of Cd-MOF-1 by gradual addition of Al<sup>3+</sup> ions (left). The plot (right) demonstrate the quenching linearity relationship at low concentrations of Al<sup>3+</sup> ion.



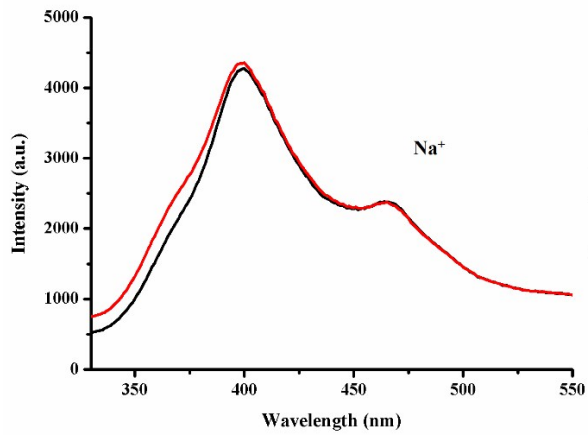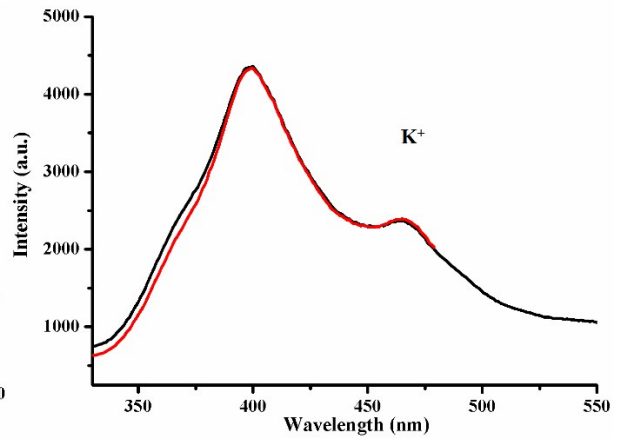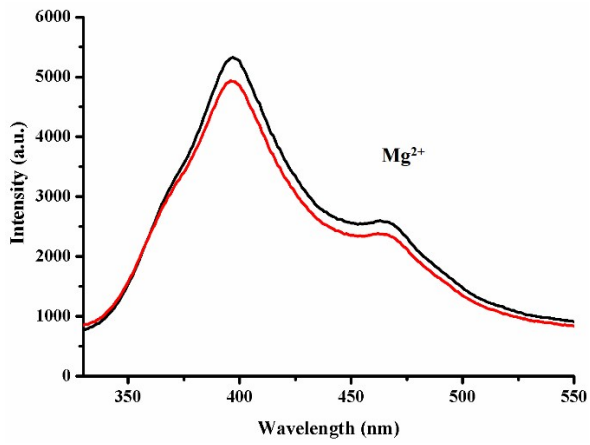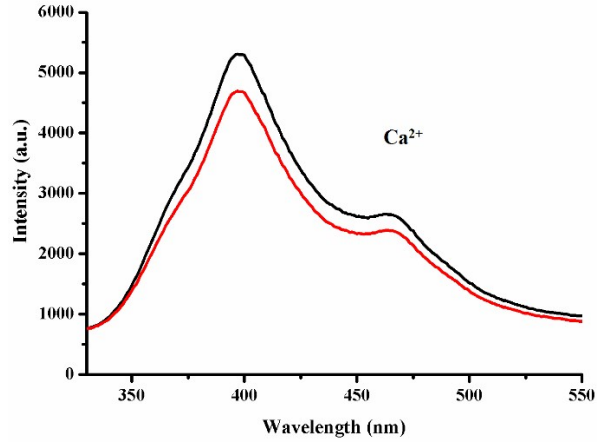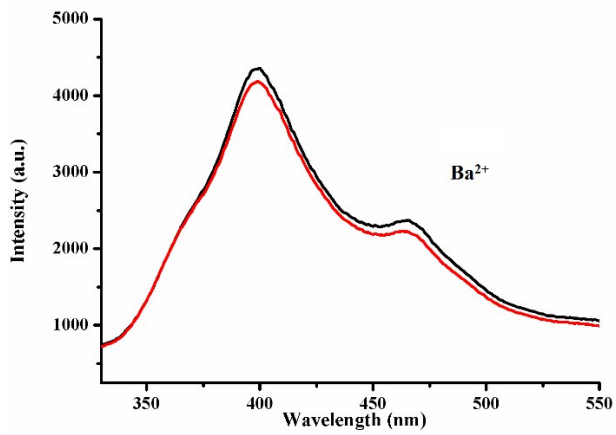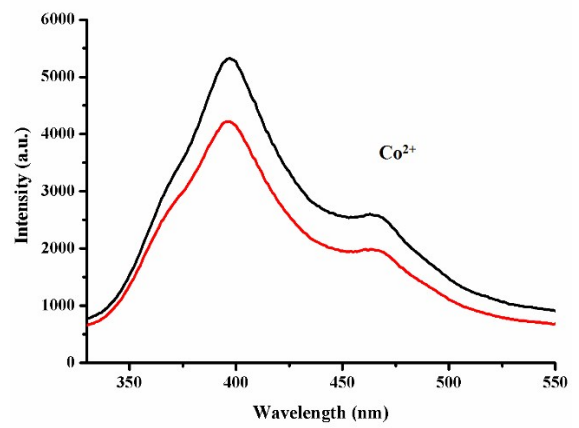

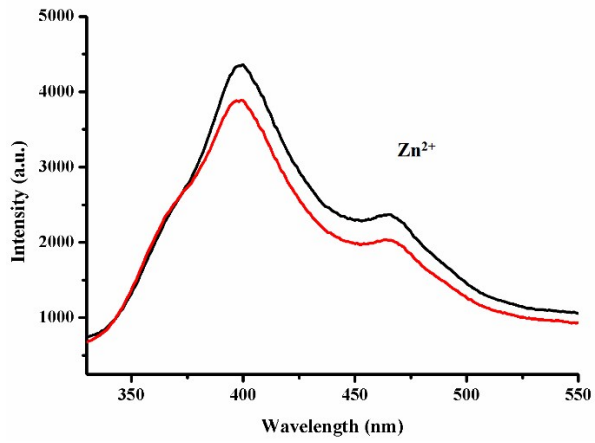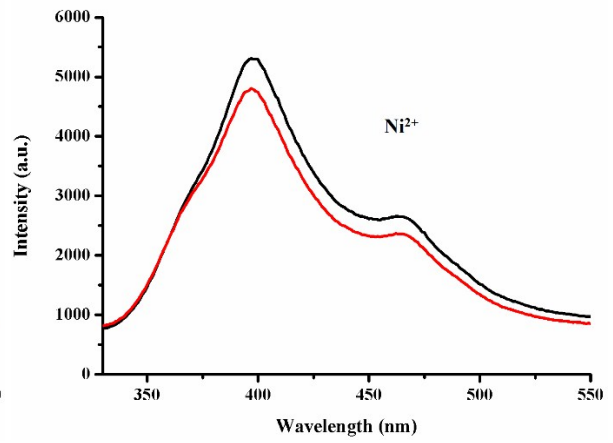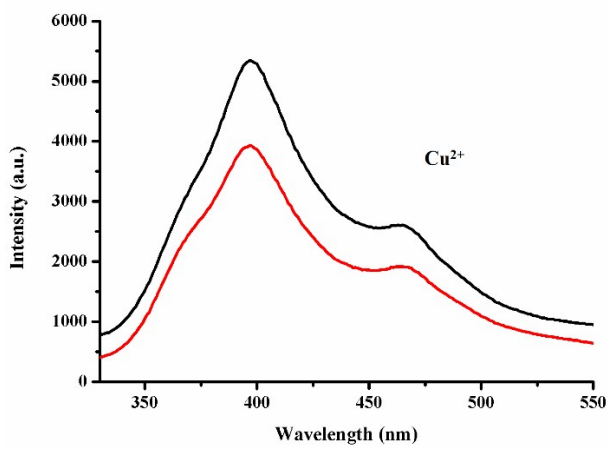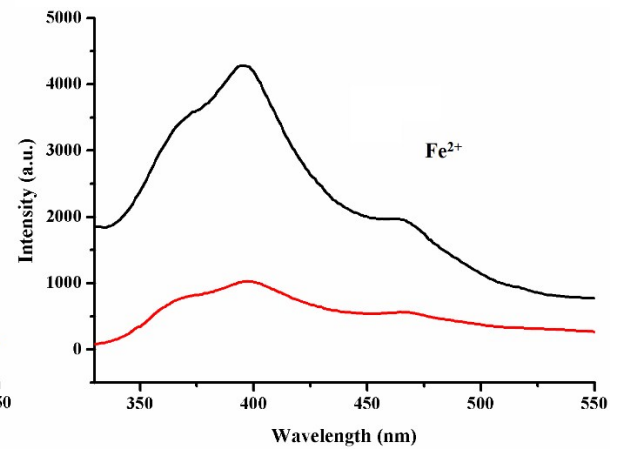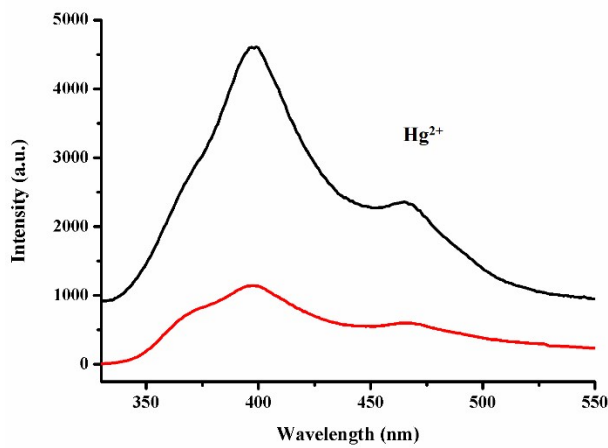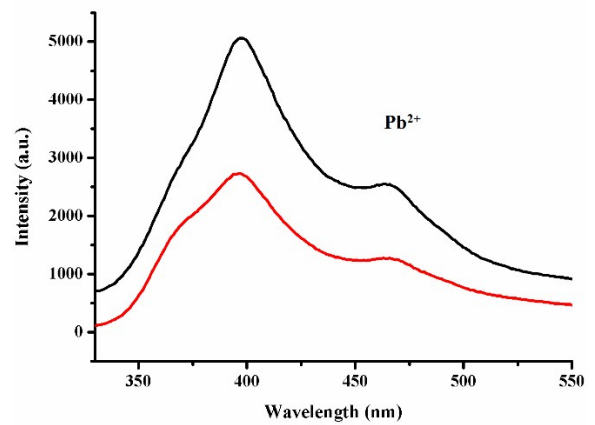



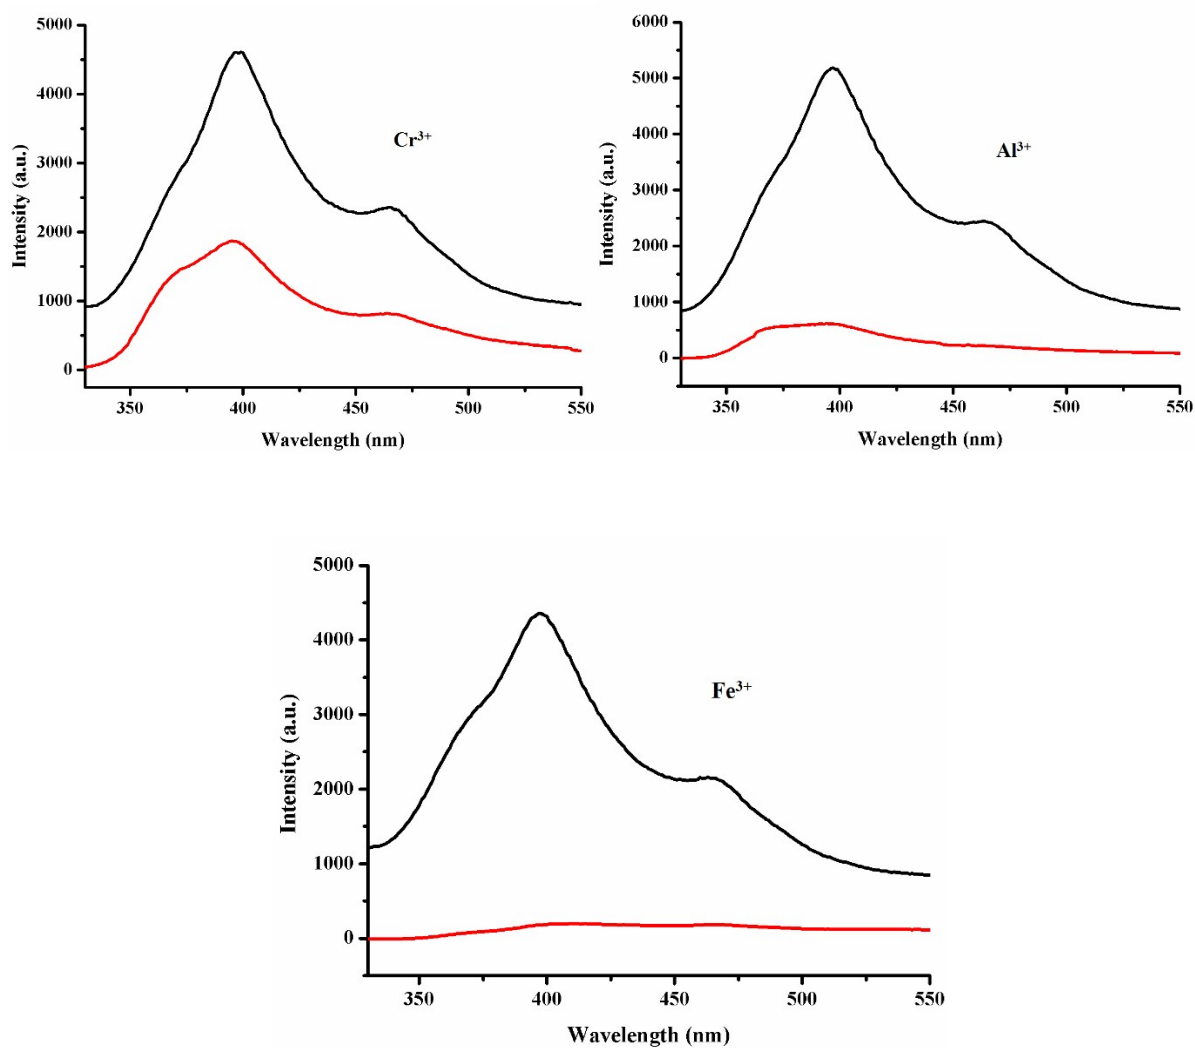

**Fig. S15** The fluorescence spectra of Cd-MOF-2 in DMF solution upon the addition of 100  $\mu\text{L}$  of  $10^{-2}$  mol/L of various metal ions.

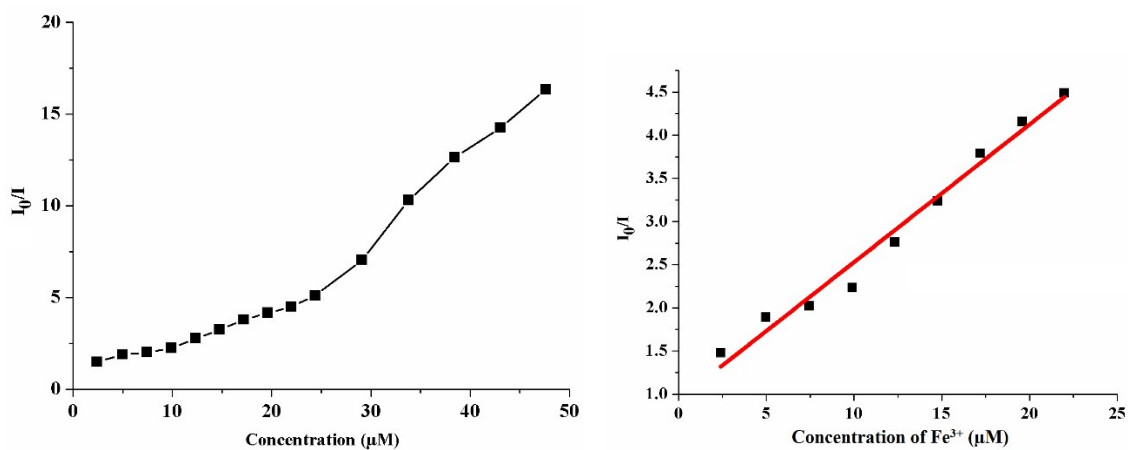

**Fig. S16** Stern-Volmer plot of Cd-MOF-2 by gradual addition of  $\text{Fe}^{3+}$  ions (left). The plot (right) demonstrate the quenching linearity relationship at low concentrations of  $\text{Fe}^{3+}$  ion.

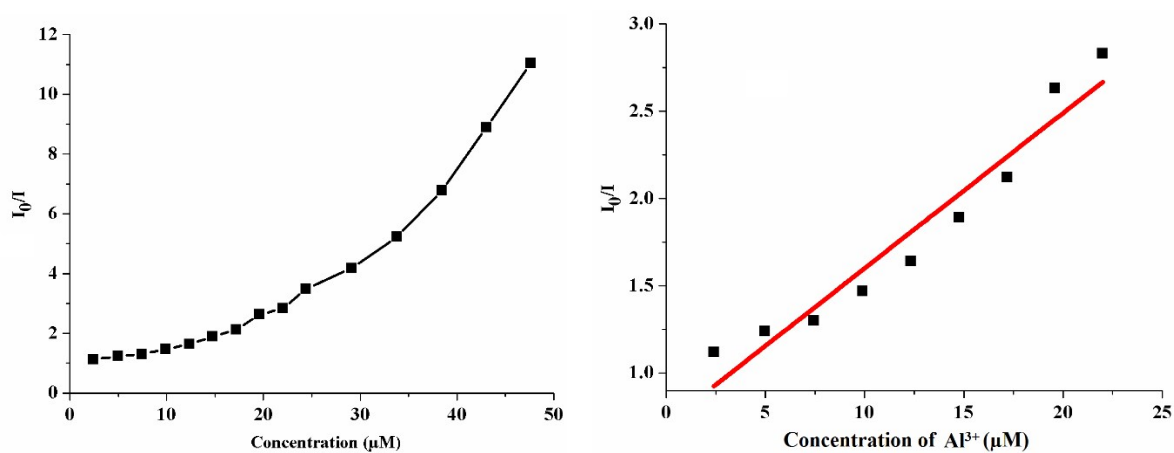

**Fig. S17** Stern-Volmer plot of Cd-MOF-2 by gradual addition of  $\text{Al}^{3+}$  ions (left). The plot (right) demonstrate the quenching linearity relationship at low concentrations of  $\text{Al}^{3+}$  ion.

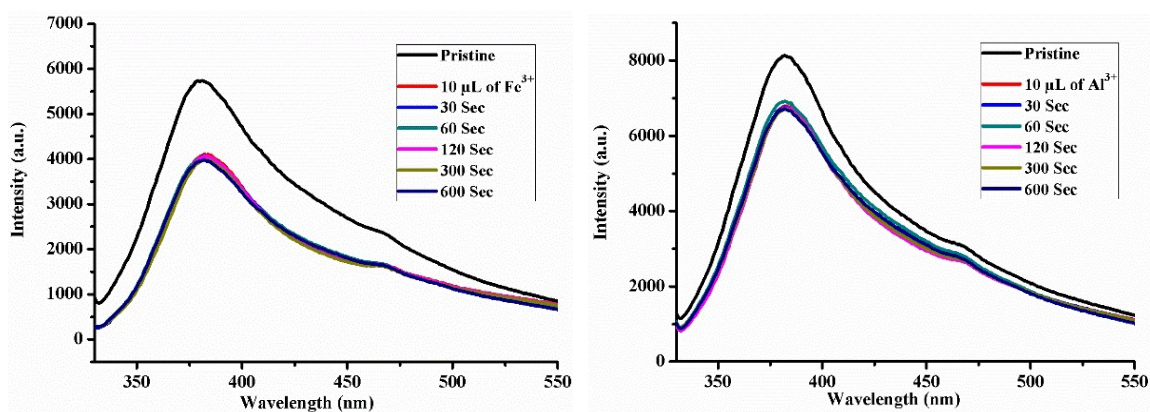

**Fig. S18** Fluorescent spectra of time-dependent Cd-MOF-1 after addition of 10  $\mu\text{L}$   $\text{Fe}^{3+}/\text{Al}^{3+}$  aqueous.

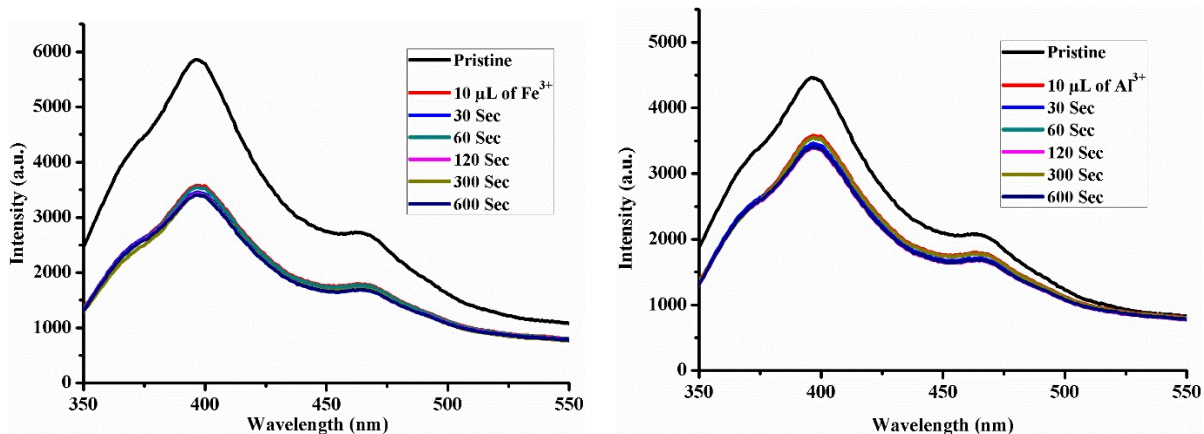

**Fig. S19** Fluorescent spectra of time-dependent Cd-MOF-2 after addition of 10  $\mu\text{L}$   $\text{Fe}^{3+}/\text{Al}^{3+}$  aqueous solutions.

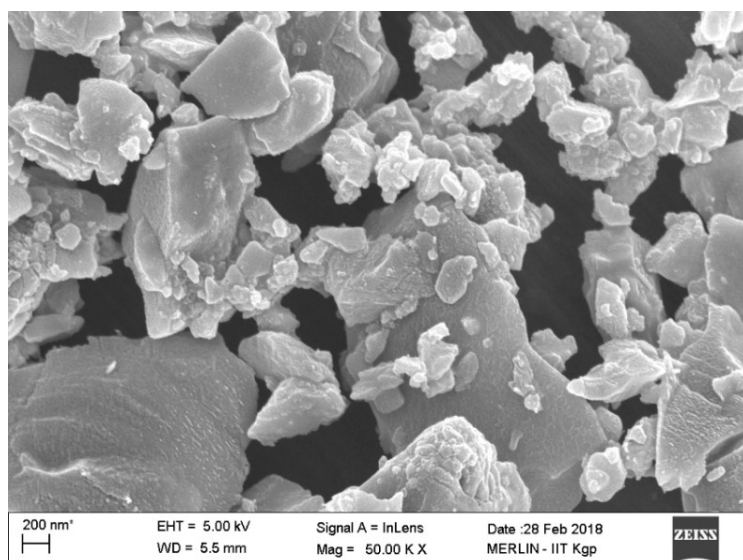

**Fig. S20 (a)** SEM image of the morphology of Cd-MOF-1 after loading Fe<sup>3+</sup>.

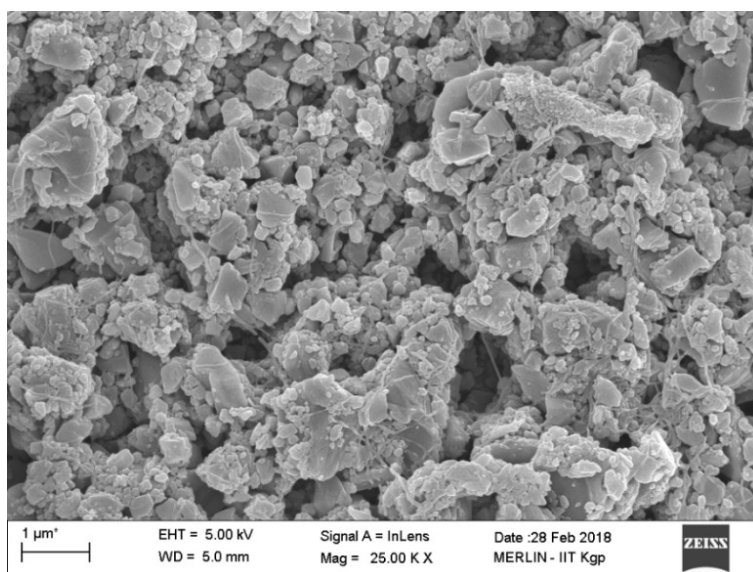

**Fig. S21 (a)** SEM image of the morphology of Cd-MOF-2 after loading Fe<sup>3+</sup>.

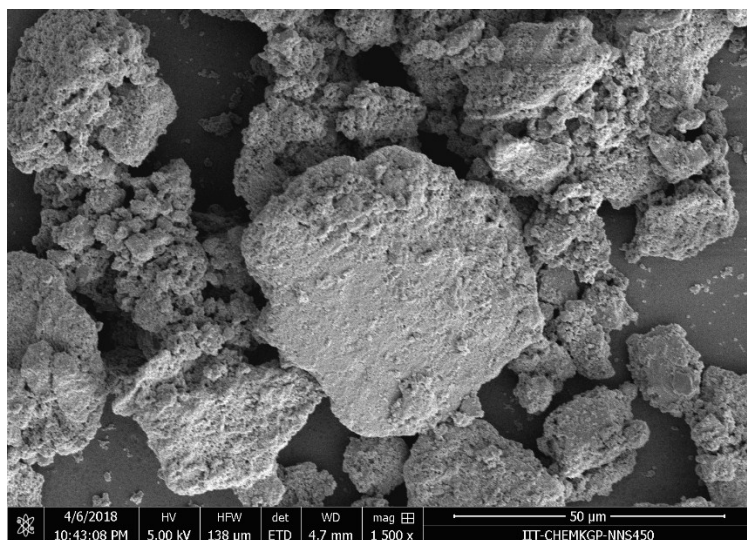

**Fig. S22 (a)** SEM image of the morphology of Cd-MOF-1 after loading Al<sup>3+</sup>.

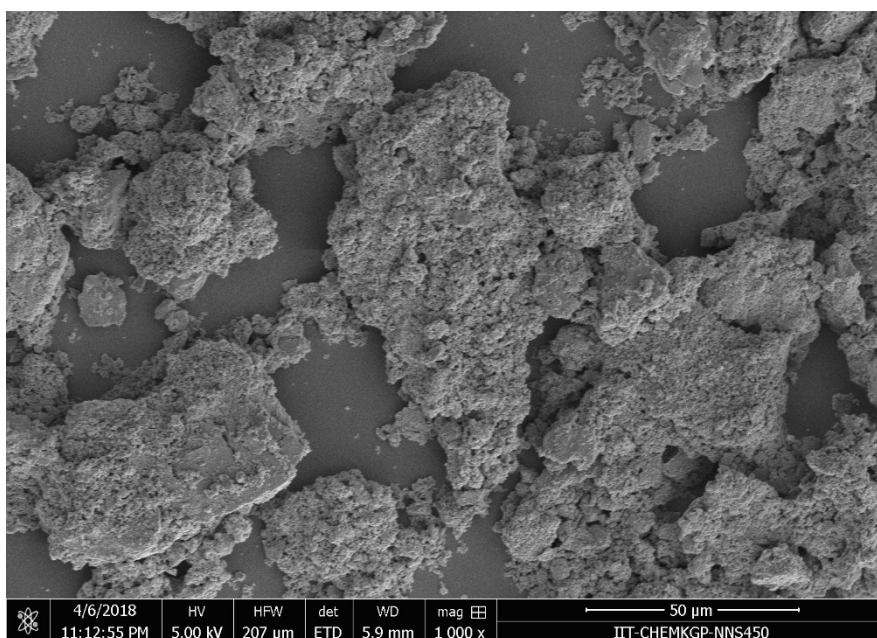

**Fig. S23 (a)** SEM image of the morphology of Cd-MOF-2 after loading Al<sup>3+</sup>.

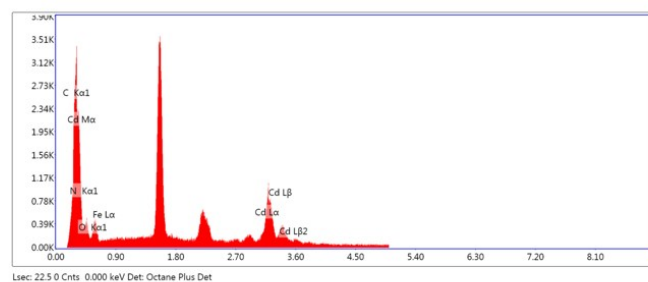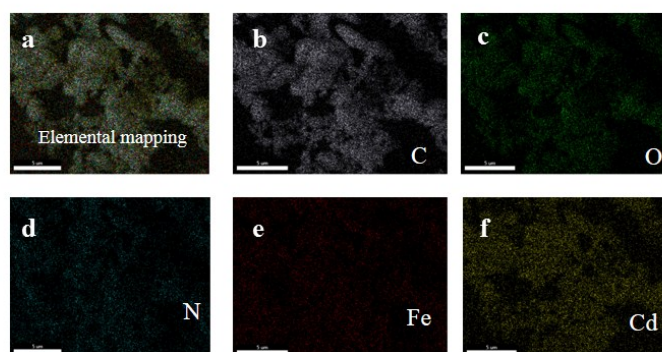

**Fig. S24** EDX mapping of Cd-MOF-1 after loading Fe<sup>3+</sup>. (a) Overlapped element mapping; (b) C element mapping; (c) N element mapping; (d) O element mapping; (e) Cd element mapping; (f) Fe element mapping.

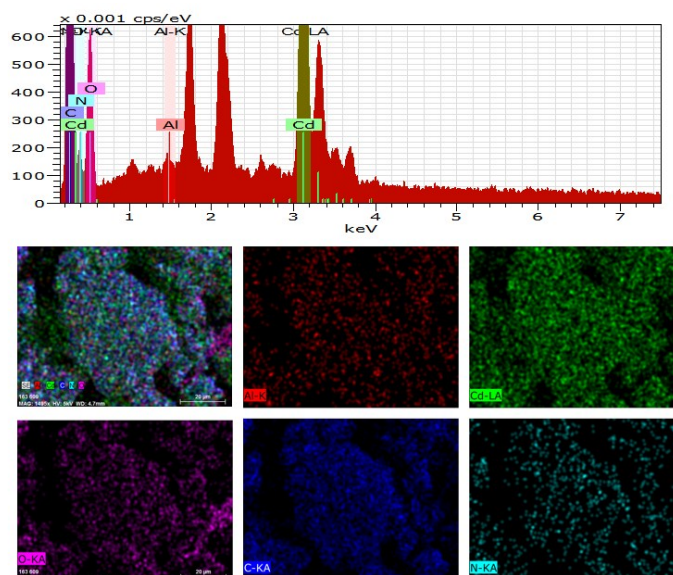

**Fig. S25** EDX mapping of Cd-MOF-1 after loading Al<sup>3+</sup> (above); Overlapped and individual element mapping (bellow).



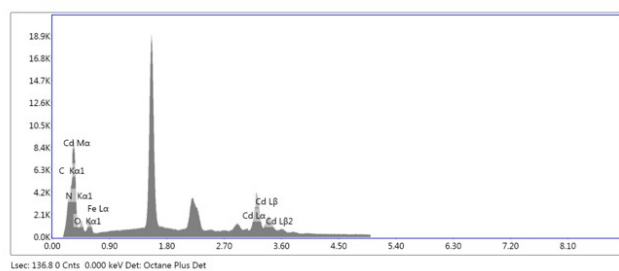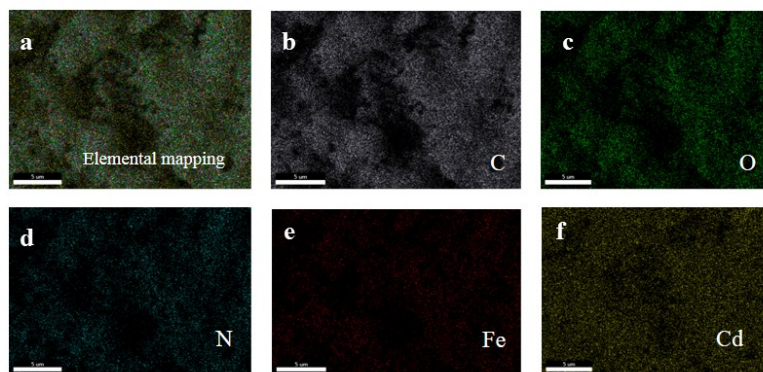

**Fig. S26** EDX mapping of Cd-MOF-2 after loading  $\text{Fe}^{3+}$ . (a) Overlapped element mapping; (b) C element mapping; (c) N element mapping; (d) O element mapping; (e) Cd element mapping; (f) Fe element mapping.

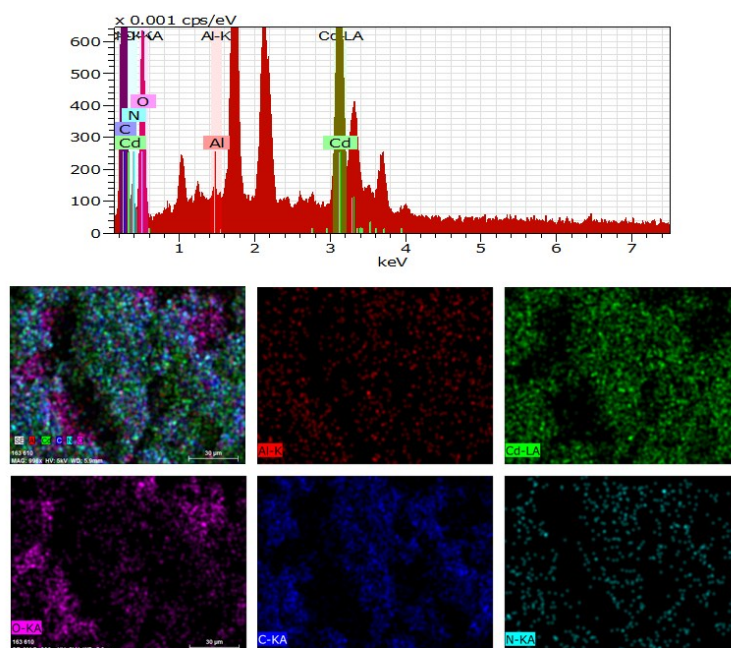

**Fig. S27** EDX mapping of Cd-MOF-2 after loading  $\text{Al}^{3+}$  (above); Overlapped and individual element mapping (below).

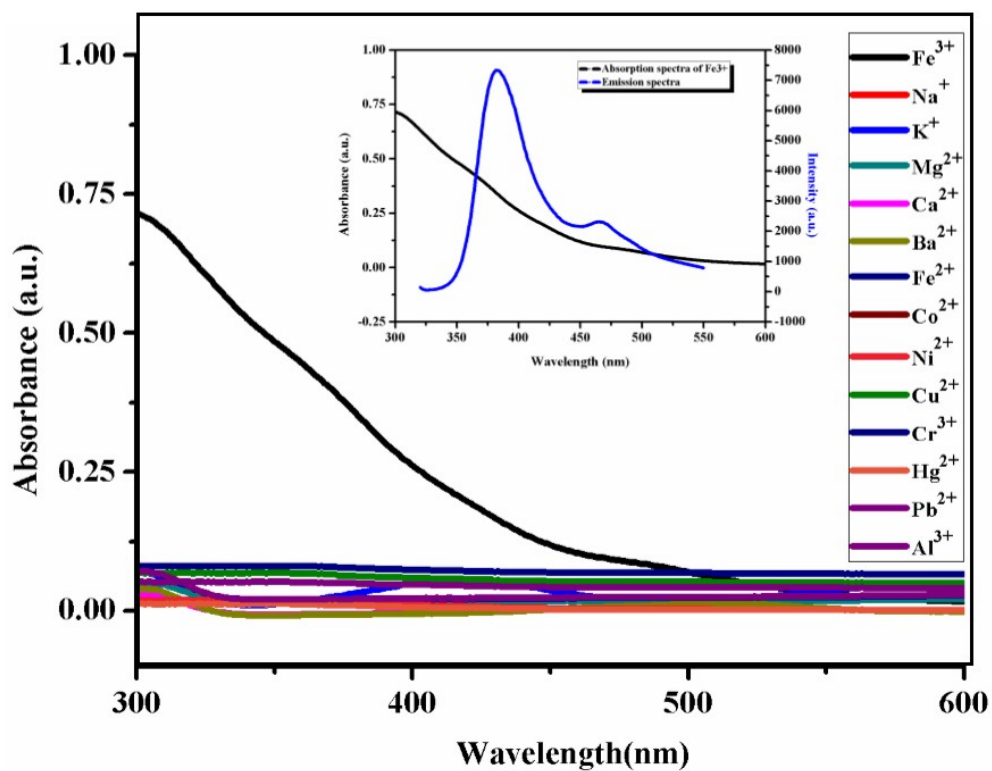

**Fig. S28** UV-Vis absorption spectra of different metal ions. In the inset, the emission spectrum of Cd-MOF-1 and the absorption spectra of Fe<sup>3+</sup> ion.

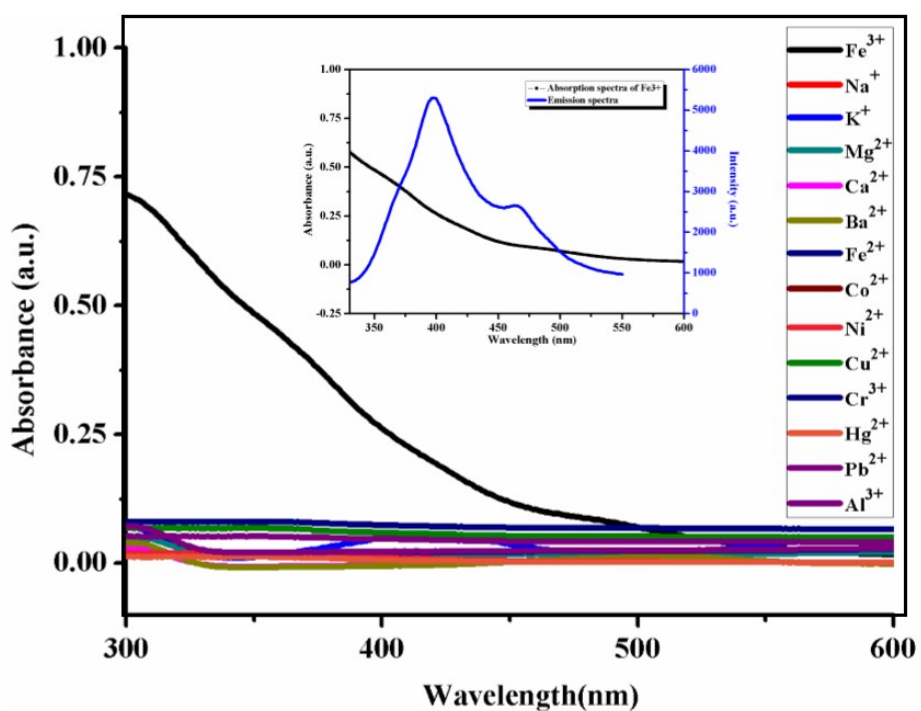

**Fig. S29** UV-Vis absorption spectra of different metal ions. In the inset, the emission spectrum of Cd-MOF-2 and the absorption spectra of Fe<sup>3+</sup> ion.



**Table S2:** Selected Bond Distances (Å) and Bond Angles (°) in **Cd-MOF-1**.

|     |     |          |            |    |          |     |            |          |
|-----|-----|----------|------------|----|----------|-----|------------|----------|
| Cd1 | O1  | 2.519(4) | Cd1        | O2 | 2.330(4) | Cd1 | N1         | 2.355(5) |
| Cd1 | O4  | 2.400(4) | Cd1        | O5 | 2.343(4) | Cd1 | N8         | 2.350(5) |
| Cd1 | O3  | 2.380(4) | Cd2        | O5 | 2.367(4) | Cd2 | N4         | 2.369(5) |
| Cd2 | O2  | 2.330(4) | Cd2        | O6 | 2.492(4) | Cd2 | O7         | 2.357(4) |
| Cd2 | O8  | 2.418(5) | Cd2        | N5 | 2.353(5) |     |            |          |
| O3  | Cd1 | O1       | 91.88(14)  | O5 | Cd1      | O1  | 125.68(14) |          |
| O5  | Cd1 | O3       | 142.26(14) | O4 | Cd1      | O1  | 146.46(14) |          |
| O4  | Cd1 | O3       | 54.89(14)  | O4 | Cd1      | O5  | 87.81(15)  |          |
| O2  | Cd1 | O1       | 53.56(14)  | O2 | Cd1      | O3  | 145.07(14) |          |
| O2  | Cd1 | O5       | 72.13(15)  | O2 | Cd1      | O4  | 159.94(15) |          |
| N8  | Cd1 | O1       | 90.46(15)  | N8 | Cd1      | O3  | 84.78(16)  |          |
| N8  | Cd1 | O5       | 90.79(16)  | N8 | Cd1      | O4  | 90.81(17)  |          |
| N8  | Cd1 | O2       | 90.00(17)  | N1 | Cd1      | O1  | 90.70(16)  |          |
| N1  | Cd1 | O3       | 97.02(16)  | N1 | Cd1      | O5  | 87.03(16)  |          |
| N1  | Cd1 | O4       | 89.24(17)  | N1 | Cd1      | O2  | 89.20(17)  |          |
| N1  | Cd1 | N8       | 177.82(16) | O5 | Cd2      | O6  | 53.65(14)  |          |
| O7  | Cd2 | O6       | 92.29(14)  | O7 | Cd2      | O5  | 145.50(14) |          |
| O8  | Cd2 | O6       | 147.17(14) | O8 | Cd2      | O5  | 159.18(15) |          |
| O8  | Cd2 | O7       | 55.08(15)  | O2 | Cd2      | O6  | 125.29(14) |          |
| O2  | Cd2 | O5       | 71.70(15)  | O2 | Cd2      | O7  | 142.31(15) |          |
| O2  | Cd2 | O8       | 87.50(15)  | N4 | Cd2      | O6  | 88.61(16)  |          |

|           |           |           |            |
|-----------|-----------|-----------|------------|
| N4 Cd2 O5 | 88.04(16) | N4 Cd2 O7 | 85.53(16)  |
| N4 Cd2 O8 | 91.93(17) | N4 Cd2 O2 | 92.02(17)  |
| N5 Cd2 O6 | 89.21(16) | N5 Cd2 O5 | 88.41(16)  |
| N5 Cd2 O7 | 97.36(16) | N5 Cd2 O8 | 91.42(17)  |
| N5 Cd2 O2 | 86.95(17) | N5 Cd2 N4 | 176.45(17) |

**Table S3:** Non-bonding interactions in **Cd-MOF-1**.

| D H...A      | d(H...A) (Å) | D(D...A) (Å) | < DHA (°)  |
|--------------|--------------|--------------|------------|
| C2 H2...O1   | 2.414(4)     | 3.220(5)     | 144.82(7)  |
| C8 H8...O7   | 2.504(4)     | 3.011(5)     | 114.55(7)  |
| C9 H9...O8   | 2.657(4)     | 3.343(5)     | 130.96(7)  |
| C12 H12...O6 | 2.364(2)     | 3.189(3)     | 147.58(10) |
| C17 H17...O3 | 2.699(3)     | 3.054(4)     | 103.57(12) |
| C18 H18...O3 | 2.653(3)     | 3.040(4)     | 105.70(10) |
| C19 H19...O4 | 2.574(3)     | 3.254(3)     | 130.34(8)  |

**Table S4:** Selected Bond Distances (Å) and Bond Angles (°) in **Cd-MOF-2**.

|           |            |           |            |        |            |
|-----------|------------|-----------|------------|--------|------------|
| Cd1 O1    | 2.2664(15) | Cd1 O2    | 2.2685(14) | Cd1 N1 | 2.3143(16) |
| Cd1 O4    | 2.3060(15) | Cd1 N4    | 2.3193(15) | Cd1 O3 | 2.4560(14) |
| O1 Cd1 O2 | 126.56(5)  | O1 Cd1 O4 | 140.89(5)  |        |            |
| O2 Cd1 O4 | 92.52(6)   | O1 Cd1 N1 | 91.24(6)   |        |            |

|           |           |           |           |
|-----------|-----------|-----------|-----------|
| O2 Cd1 N1 | 92.63(5)  | O4 Cd1 N1 | 84.79(6)  |
| O1 Cd1 N4 | 85.83(5)  | O2 Cd1 N4 | 84.66(5)  |
| O4 Cd1 N4 | 101.01(6) | N1 Cd1 N4 | 173.68(5) |
| O1 Cd1 O3 | 86.46(5)  | O2 Cd1 O3 | 146.94(5) |
| O4 Cd1 O3 | 54.57(5)  | N1 Cd1 O3 | 87.83(5)  |
| N4 Cd1 O3 | 97.56(5)  |           |           |

**Table S5:** Non-bonding interactions in **Cd-MOF-2**.

| D H...A      | d(H...A) (Å) | D(D...A) (Å) | < DHA (°)  |
|--------------|--------------|--------------|------------|
| C15 H15...O1 | 2.672(4)     | 3.206(5)     | 117.16(7)  |
| C16 H16...O2 | 2.457(2)     | 3.073(3)     | 123.85(10) |
| C18 H18...O3 | 2.301(3)     | 3.147(4)     | 150.99(12) |
| C10 H10...O4 | 2.128(3)     | 2.996(4)     | 154.91(10) |

**Table S6.** A comparison of MOF-based luminescent probes for the detection of Fe<sup>3+</sup> ions.

| Fluorescent Material                                                                                                                     | $K_{sv}$ value (L/M <sup>-1</sup> ) | Reference                                           |
|------------------------------------------------------------------------------------------------------------------------------------------|-------------------------------------|-----------------------------------------------------|
| {[Tb <sub>4</sub> (OH) <sub>4</sub> (DSOA) <sub>2</sub> (H <sub>2</sub> O) <sub>8</sub> ].(H <sub>2</sub> O) <sub>8</sub> } <sub>n</sub> | 3.543×10 <sup>4</sup>               | <i>J. Mater. Chem. A</i> , <b>2015</b> , 3, 641–647 |
| {(Me <sub>2</sub> NH <sub>2</sub> )[Tb(OBA) <sub>2</sub> ].(Hatz).·(H <sub>2</sub> O)1.5} <sub>n</sub>                                   | 3.4×10 <sup>4</sup>                 | <i>J. Mater. Chem. C</i> , 2017, 5, 2311-2317       |
| (MOF-LIC-1). <sub>Eu</sub>                                                                                                               | 2.8×10 <sup>4</sup>                 | <i>J. Mater. Chem. C</i> , 2014, 2, 6758–6764       |
| <b>Cd-MOF-1</b>                                                                                                                          | 2.1×10 <sup>4</sup>                 | <b>This Work</b>                                    |
| Eu–HODA                                                                                                                                  | 2.09×10 <sup>4</sup>                | <i>Inorg. Chem.</i> <b>2016</b> , 55, 12660–12668   |
| [Zn <sub>2</sub> (TPOM)(NDC) <sub>2</sub> ].3.5H <sub>2</sub> O                                                                          | 1.9×10 <sup>4</sup>                 | <i>Inorg. Chem.</i> <b>2017</b> , 56, 12348–12356   |
| [Cd <sub>3</sub> {Ir(ppy)-                                                                                                               | 1.165×10 <sup>4</sup>               | <i>Inorg. Chem.</i> <b>2018</b> , 57,               |

|                                                                                                                                |                    |                                                                |
|--------------------------------------------------------------------------------------------------------------------------------|--------------------|----------------------------------------------------------------|
| $(\text{COO})_3\}_2(\text{DMF})_2(\text{H}_2\text{O})_4] \cdot 6\text{H}_2\text{O} \cdot 2\text{DMF}$                          |                    | 1079–1089                                                      |
| $[\text{Tb}(\text{TBOT})(\text{H}_2\text{O})](\text{H}_2\text{O})_4(\text{DMF})(\text{NMP})_{0.5}$                             | $5.51 \times 10^3$ | <i>J. Mater. Chem. C</i> , <b>2017</b> , <i>5</i> , 2015–2021. |
| <b>Cd-MOF-2</b>                                                                                                                | $5.4 \times 10^3$  | <b>This Work</b>                                               |
| $[\text{Zr}_6\text{O}_4(\text{OH})_4(\text{C}_8\text{H}_2\text{O}_4\text{S}_2)_6] \cdot \text{DMF} \cdot 18\text{H}_2\text{O}$ | $4.41 \times 10^3$ | <i>Dalton Trans.</i> , <b>2018</b> , <i>47</i> , 1159–1170.    |
| $\{\text{Tb}(\text{TATAB})(\text{H}_2\text{O})_2\} \cdot \text{NMP} \cdot \text{H}_2\text{O}\}_n$                              | $3.6 \times 10^3$  | <i>Dalton Trans.</i> , <b>2016</b> , <i>45</i> , 15492–15499.  |
| $[\text{Zn}_2(\text{L}_1)_2(\text{bpe})_2(\text{H}_2\text{O})_2]$                                                              | 2395               | <i>Dalton Trans.</i> , <b>2015</b> , <i>44</i> , 18795–18803.  |
| $\text{Ln}_3\text{L}_2(\text{OH})(\text{DMF})_{0.22}(\text{H}_2\text{O})_{5.78}] \cdot \text{guest}$                           | 393                | <i>ChemPlusChem</i> <b>2016</b> , <i>81</i> , 1299–1304.       |

**Table S7.** A comparison of MOF-based luminescent probes for the detection of  $\text{Al}^{3+}$  ions.

| Fluorescent Material                                                                       | $K_{SV}$ (L/mole)  | Reference                                                           |
|--------------------------------------------------------------------------------------------|--------------------|---------------------------------------------------------------------|
| $\{\text{Eu}(\text{BTB})(\text{phen})\} \cdot 4.5\text{DMF} \cdot 2\text{H}_2\text{O}\}_n$ | $1.59 \times 10^4$ | <i>Inorg. Chem.</i> , <b>2016</b> , <i>55</i> , 9671–9676           |
| $\{\text{Zn}(\text{DMA})(\text{TBA})\}_n$                                                  | $1.33 \times 10^4$ | <i>Inorg. Chem. Front.</i> , <b>2017</b> , <i>4</i> , 1888–1894     |
| <b>Cd-MOF-1</b>                                                                            | $4.9 \times 10^3$  | <b>This Work</b>                                                    |
| (TMU-34) F                                                                                 | 4170               | <i>Ultrasonics - Sonochemistry</i> <b>2018</b> , <i>41</i> , 17–26. |
| <b>Cd-MOF-2</b>                                                                            | $2.6 \times 10^3$  | <b>This Work</b>                                                    |

### References:

- (1) SAINT+, 6.02ed, Bruker AXS, Madison, WI, 1999.
- (2) XPREP, 5.1 ed. Siemens Industrial Automation Inc., Madison, WI, 1995.
- (3) G. M. Sheldrick, *SHELXTL™ Reference Manual*: version 5.1, Bruker AXS, Madison, WI, 1997.
- (4) G. M. Sheldrick, Crystal Structure Refinement with SHELXL. *Acta Cryst C*, 2015, **71**, 3–8.
- (5) A. L. Spek, Single-crystal Structure Validation with the Program PLATON. *J. Appl. Crystallogr.* 2003, **36**, 7–13.
